# Supplementary material for: Molecular epidemiology of Streptococcus agalactiae in non-pregnant populations: a systematic review
Source: PubMed Central journal article supplement (PMC10711312; doi:10.1099/mgen.0.001140), 2023-11-29
Supplement: mgen-9-1140-s001.pdf [file mgen-9-1140-s001.pdf]

# Molecular Epidemiology of *Streptococcus agalactiae* in non-pregnant populations: A Systematic Review

Luria Leslie Founou<sup>1,2,3\*†</sup>, Uzma Basit Khan<sup>4†</sup>, Nubwa Medugu<sup>5</sup>, Tatiana C.A. Pinto<sup>6</sup>, Saffiatou Darboe<sup>7</sup>, Zhu Chendi<sup>8</sup>, Raspail Carrel Founou<sup>3,9,10</sup>, Ka-Ning To<sup>11</sup>, Dorota Jamrozny<sup>4</sup>, Konstantinos Karampatsas<sup>11</sup>, Victoria R. Carr<sup>4,12</sup>, Kevin Pepper<sup>4</sup>, Ziyaad Dangor<sup>13</sup>, Margaret Ip<sup>8</sup>, Kirsty Le Doare<sup>14</sup>, Stephen D. Bentley<sup>4,15#</sup>

## Supplementary materials

**Table S1. PRISMA checklist**

| Section and Topic             | Item # | Checklist item                                                                                                                                                                                                                                                                                       | Location where item is reported |
|-------------------------------|--------|------------------------------------------------------------------------------------------------------------------------------------------------------------------------------------------------------------------------------------------------------------------------------------------------------|---------------------------------|
| <b>TITLE</b>                  |        |                                                                                                                                                                                                                                                                                                      |                                 |
| Title                         | 1      | Identify the report as a systematic review.                                                                                                                                                                                                                                                          | P1                              |
| <b>ABSTRACT</b>               |        |                                                                                                                                                                                                                                                                                                      |                                 |
| Abstract                      | 2      | See the PRISMA 2020 for Abstracts checklist.                                                                                                                                                                                                                                                         | P2                              |
| <b>INTRODUCTION</b>           |        |                                                                                                                                                                                                                                                                                                      |                                 |
| Rationale                     | 3      | Describe the rationale for the review in the context of existing knowledge.                                                                                                                                                                                                                          | p3                              |
| Objectives                    | 4      | Provide an explicit statement of the objective(s) or question(s) the review addresses.                                                                                                                                                                                                               | p3                              |
| <b>METHODS</b>                |        |                                                                                                                                                                                                                                                                                                      |                                 |
| Eligibility criteria          | 5      | Specify the inclusion and exclusion criteria for the review and how studies were grouped for the syntheses.                                                                                                                                                                                          | P4, Table S3                    |
| Information sources           | 6      | Specify all databases, registers, websites, organisations, reference lists and other sources searched or consulted to identify studies. Specify the date when each source was last searched or consulted.                                                                                            | P4, Table S2                    |
| Search strategy               | 7      | Present the full search strategies for all databases, registers and websites, including any filters and limits used.                                                                                                                                                                                 | P4, Table S2                    |
| Selection process             | 8      | Specify the methods used to decide whether a study met the inclusion criteria of the review, including how many reviewers screened each record and each report retrieved, whether they worked independently, and if applicable, details of automation tools used in the process.                     | P4-5, Table S3                  |
| Data collection process       | 9      | Specify the methods used to collect data from reports, including how many reviewers collected data from each report, whether they worked independently, any processes for obtaining or confirming data from study investigators, and if applicable, details of automation tools used in the process. | P4-5                            |
| Data items                    | 10a    | List and define all outcomes for which data were sought. Specify whether all results that were compatible with each outcome domain in each study were sought (e.g. for all measures, time points, analyses), and if not, the methods used to decide which results to collect.                        | P3-5, Table S5                  |
|                               | 10b    | List and define all other variables for which data were sought (e.g. participant and intervention characteristics, funding sources). Describe any assumptions made about any missing or unclear information.                                                                                         | P3-5, Table S5                  |
| Study risk of bias assessment | 11     | Specify the methods used to assess risk of bias in the included studies, including details of the tool(s) used, how many reviewers assessed each study and whether they worked independently, and if applicable, details of automation tools used in the process.                                    | P5, Table S4                    |
| Effect measures               | 12     | Specify for each outcome the effect measure(s) (e.g. risk ratio, mean difference) used in the synthesis or presentation of results.                                                                                                                                                                  | NA                              |
| Synthesis                     | 13a    | Describe the processes used to decide which studies were eligible for each synthesis (e.g. tabulating the study intervention characteristics and                                                                                                                                                     | P4                              |

| Section and Topic             | Item # | Checklist item                                                                                                                                                                                                                                                                       | Location where item is reported |
|-------------------------------|--------|--------------------------------------------------------------------------------------------------------------------------------------------------------------------------------------------------------------------------------------------------------------------------------------|---------------------------------|
| methods                       |        | comparing against the planned groups for each synthesis (item #5)).                                                                                                                                                                                                                  |                                 |
|                               | 13b    | Describe any methods required to prepare the data for presentation or synthesis, such as handling of missing summary statistics, or data conversions.                                                                                                                                | P4-5                            |
|                               | 13c    | Describe any methods used to tabulate or visually display results of individual studies and syntheses.                                                                                                                                                                               | P4-5                            |
|                               | 13d    | Describe any methods used to synthesize results and provide a rationale for the choice(s). If meta-analysis was performed, describe the model(s), method(s) to identify the presence and extent of statistical heterogeneity, and software package(s) used.                          | NA                              |
|                               | 13e    | Describe any methods used to explore possible causes of heterogeneity among study results (e.g. subgroup analysis, meta-regression).                                                                                                                                                 | NA                              |
|                               | 13f    | Describe any sensitivity analyses conducted to assess robustness of the synthesized results.                                                                                                                                                                                         | NA                              |
| Reporting bias assessment     | 14     | Describe any methods used to assess risk of bias due to missing results in a synthesis (arising from reporting biases).                                                                                                                                                              | P4                              |
| Certainty assessment          | 15     | Describe any methods used to assess certainty (or confidence) in the body of evidence for an outcome.                                                                                                                                                                                | P4                              |
| <b>RESULTS</b>                |        |                                                                                                                                                                                                                                                                                      |                                 |
| Study selection               | 16a    | Describe the results of the search and selection process, from the number of records identified in the search to the number of studies included in the review, ideally using a flow diagram.                                                                                         | P7-8, Figure 1                  |
|                               | 16b    | Cite studies that might appear to meet the inclusion criteria, but which were excluded, and explain why they were excluded.                                                                                                                                                          | P7-8, Figure 1                  |
| Study characteristics         | 17     | Cite each included study and present its characteristics.                                                                                                                                                                                                                            | P7-8, Table 1, Table S5         |
| Risk of bias in studies       | 18     | Present assessments of risk of bias for each included study.                                                                                                                                                                                                                         | P7-8, Table S4                  |
| Results of individual studies | 19     | For all outcomes, present, for each study: (a) summary statistics for each group (where appropriate) and (b) an effect estimate and its precision (e.g. confidence/credible interval), ideally using structured tables or plots.                                                     | Table 1, Table S5               |
| Results of syntheses          | 20a    | For each synthesis, briefly summarise the characteristics and risk of bias among contributing studies.                                                                                                                                                                               | P7-11                           |
|                               | 20b    | Present results of all statistical syntheses conducted. If meta-analysis was done, present for each the summary estimate and its precision (e.g. confidence/credible interval) and measures of statistical heterogeneity. If comparing groups, describe the direction of the effect. | P7-11                           |
|                               | 20c    | Present results of all investigations of possible causes of heterogeneity among study results.                                                                                                                                                                                       | P7-11                           |
|                               | 20d    | Present results of all sensitivity analyses conducted to assess the robustness of the synthesized results.                                                                                                                                                                           | P7-11                           |
| Reporting biases              | 21     | Present assessments of risk of bias due to missing results (arising from reporting biases) for each synthesis assessed.                                                                                                                                                              | P7-11                           |
| Certainty of evidence         | 22     | Present assessments of certainty (or confidence) in the body of evidence for each outcome assessed.                                                                                                                                                                                  | P7-11                           |
| <b>DISCUSSION</b>             |        |                                                                                                                                                                                                                                                                                      |                                 |
| Discussion                    | 23a    | Provide a general interpretation of the results in the context of other evidence.                                                                                                                                                                                                    | P12-15                          |
|                               | 23b    | Discuss any limitations of the evidence included in the review.                                                                                                                                                                                                                      | P12-14                          |

| Section and Topic                              | Item # | Checklist item                                                                                                                                                                                                                             | Location where item is reported |
|------------------------------------------------|--------|--------------------------------------------------------------------------------------------------------------------------------------------------------------------------------------------------------------------------------------------|---------------------------------|
|                                                | 23c    | Discuss any limitations of the review processes used.                                                                                                                                                                                      | P12-14                          |
|                                                | 23d    | Discuss implications of the results for practice, policy, and future research.                                                                                                                                                             | P12-14                          |
| <b>OTHER INFORMATION</b>                       |        |                                                                                                                                                                                                                                            |                                 |
| Registration and protocol                      | 24a    | Provide registration information for the review, including register name and registration number, or state that the review was not registered.                                                                                             | P4                              |
|                                                | 24b    | Indicate where the review protocol can be accessed, or state that a protocol was not prepared.                                                                                                                                             | P4                              |
|                                                | 24c    | Describe and explain any amendments to information provided at registration or in the protocol.                                                                                                                                            | NA                              |
| Support                                        | 25     | Describe sources of financial or non-financial support for the review, and the role of the funders or sponsors in the review.                                                                                                              | P15                             |
| Competing interests                            | 26     | Declare any competing interests of review authors.                                                                                                                                                                                         | P14                             |
| Availability of data, code and other materials | 27     | Report which of the following are publicly available and where they can be found: template data collection forms; data extracted from included studies; data used for all analyses; analytic code; any other materials used in the review. | P14                             |

From: Page MJ, McKenzie JE, Bossuyt PM, Boutron I, Hoffmann TC, Mulrow CD, et al. The PRISMA 2020 statement: an updated guideline for reporting systematic reviews. *BMJ* 2021;372:n71. doi: 10.1136/bmj.n71

For more information, visit: <http://www.prisma-statement.org/>

**Table S2: Search strategy**

|                                        |                                                                                                                                                                                                                                                                                                                                                                                                                                                                                                                                                                                    |
|----------------------------------------|------------------------------------------------------------------------------------------------------------------------------------------------------------------------------------------------------------------------------------------------------------------------------------------------------------------------------------------------------------------------------------------------------------------------------------------------------------------------------------------------------------------------------------------------------------------------------------|
| <b><u>Date of search performed</u></b> | 20th September 2021                                                                                                                                                                                                                                                                                                                                                                                                                                                                                                                                                                |
| <b><u>Databases searched</u></b>       | PubMed, Cochrane Library, ISI Web of Knowledge, EBSCOhost, Chinese database of the World Health Organization Library Information System (WHOLIS), Literature in Health Sciences in Latin America and the Caribbean (LILACS), China National Knowledge Infrastructure database, Wanfang med online database, African Journals Online                                                                                                                                                                                                                                                |
| <b><u>Search terms</u></b>             | Molecular epidemiology OR genetic diversity OR mechanisms of resistance OR drug resistance OR antibiotic resistance gene OR antimicrobial resistance OR genotyping OR serotyping OR AMR genotype<br>AND<br>Streptococcus agalactiae OR group B streptococcus OR Group B streptococcal OR Group B streptococcal infection OR Group B streptococcal colonization OR Group B streptococcal colonisation<br>AND<br>Male OR men OR infants OR child* OR women OR female OR non-pregnant OR elderly OR aged<br>NOT<br>pregnant women OR review OR conference OR letter OR correspondence |
| <b><u>Restrictions</u></b>             | 01 January 2000 onwards                                                                                                                                                                                                                                                                                                                                                                                                                                                                                                                                                            |

**Table S3: Inclusion and Exclusion Criteria**

|                                                                                                                                                                                                                                                                                                                                                                                                                                                                                                                                                |
|------------------------------------------------------------------------------------------------------------------------------------------------------------------------------------------------------------------------------------------------------------------------------------------------------------------------------------------------------------------------------------------------------------------------------------------------------------------------------------------------------------------------------------------------|
| <b>Inclusion criteria</b>                                                                                                                                                                                                                                                                                                                                                                                                                                                                                                                      |
| <ul style="list-style-type: none"><li>- Original research</li><li>- Minimum 20 patients or 20 GBS isolates</li><li>- Studies reporting at least serotype of GBS in neonates &gt; 3 months, and/or non-pregnant adults (men, women, elderly) and,</li><li>- Studies reporting on molecular characteristics of GBS i.e serotype and/or, sequence type, and/or specific surface protein genes, and/or antimicrobial resistance genes, and/or virulence genes and/or mobile genetic elements of isolated GBS in the selected populations</li></ul> |
| <b>Exclusion criteria</b>                                                                                                                                                                                                                                                                                                                                                                                                                                                                                                                      |
| <ul style="list-style-type: none"><li>- Studies dealing only with pregnant women and neonates &lt; 3 months</li><li>- Studies dealing only with prevalence and AST of GBS in pregnant and/or non-pregnant population</li><li>- Studies published prior 2000</li><li>- Non-published papers,</li><li>- Review, letter to editor, conference paper, case report,</li><li>- Studies with less than 20 participants or 20 GBS isolates</li></ul>                                                                                                   |

**Table S4. Quality Assessment Sheet**

| Author names  | Publication Year | 1. Was the sample frame appropriate to address the target population? | 2. Were study participants recruited in an appropriate way? | 3. Was the sample size adequate? | 4. Were the study subjects and setting described in detail? | 5. Was data analysis conducted with sufficient coverage of the identified sample? | 6. Were valid methods used for the identification of the condition? | 7. Was the condition measured in a standard, reliable way for all participants? | 8. Was there appropriate statistical analysis? | 9. Was the response rate adequate, and if 0t, was the low response rate managed appropriately? | Score | Status<br>>6: High,<br>3-6: Moderate,<br><3: poor |
|---------------|------------------|-----------------------------------------------------------------------|-------------------------------------------------------------|----------------------------------|-------------------------------------------------------------|-----------------------------------------------------------------------------------|---------------------------------------------------------------------|---------------------------------------------------------------------------------|------------------------------------------------|------------------------------------------------------------------------------------------------|-------|---------------------------------------------------|
| Gudjónsdóttir | 2015             | 1                                                                     | 1                                                           | 1                                | 0                                                           | 1                                                                                 | 1                                                                   | 1                                                                               | 1                                              | 1                                                                                              | 8     | High                                              |
| Kekic         | 2021             | 1                                                                     | 0                                                           | 1                                | 1                                                           | 1                                                                                 | 1                                                                   | 1                                                                               | 1                                              | 1                                                                                              | 8     | High                                              |
| Kernéis       | 2017             | 1                                                                     | 1                                                           | 1                                | 1                                                           | 1                                                                                 | 1                                                                   | 1                                                                               | 1                                              | 1                                                                                              | 9     | High                                              |
| Lambertsen    | 2010             | 1                                                                     | 1                                                           | 1                                | 0                                                           | 1                                                                                 | 1                                                                   | 1                                                                               | 1                                              | 1                                                                                              | 8     | High                                              |
| Lo            | 2019             | 1                                                                     | 1                                                           | 1                                | 1                                                           | 1                                                                                 | 1                                                                   | 1                                                                               | 1                                              | 0                                                                                              | 8     | High                                              |
| Lopardo       | 2003             | 1                                                                     | 1                                                           | 0                                | 0                                                           | 0                                                                                 | 1                                                                   | 1                                                                               | 0                                              | 1                                                                                              | 5     | Moderate                                          |
| Lopes         | 2017             | 1                                                                     | 1                                                           | 1                                | 0                                                           | 1                                                                                 | 1                                                                   | 1                                                                               | 1                                              | 0                                                                                              | 7     | High                                              |
| Meehan        | 2014             | 1                                                                     | 1                                                           | 1                                | 0                                                           | 1                                                                                 | 1                                                                   | 1                                                                               | 1                                              | 0                                                                                              | 7     | High                                              |
| Nagano        | 2019             | 1                                                                     | 0                                                           | 1                                | 0                                                           | 1                                                                                 | 1                                                                   | 1                                                                               | 0                                              | 0                                                                                              | 5     | Moderate                                          |
| Otaguiri      | 2013             | 1                                                                     | 0                                                           | 1                                | 1                                                           | 1                                                                                 | 1                                                                   | 1                                                                               | 1                                              | 0                                                                                              | 7     | High                                              |
| Persson       | 2008             | 1                                                                     | 0                                                           | 1                                | 1                                                           | 1                                                                                 | 1                                                                   | 1                                                                               | 1                                              | 0                                                                                              | 7     | High                                              |
| Slotved       | 2021             | 1                                                                     | 0                                                           | 1                                | 1                                                           | 1                                                                                 | 1                                                                   | 1                                                                               | 1                                              | 0                                                                                              | 7     | High                                              |
| Teatero       | 2015a            | 1                                                                     | 0                                                           | 1                                | 0                                                           | 0                                                                                 | 1                                                                   | 1                                                                               | 1                                              | 0                                                                                              | 5     | Moderate                                          |
| Teatero       | 2014 ;2015b      | 1                                                                     | 1                                                           | 1                                | 0                                                           | 1                                                                                 | 1                                                                   | 1                                                                               | 1                                              | 1                                                                                              | 8     | High                                              |
| Usein         | 2014             | 1                                                                     | 0                                                           | 1                                | 0                                                           | 1                                                                                 | 1                                                                   | 1                                                                               | 1                                              | 0                                                                                              | 6     | Moderate                                          |
| Tan           | 2016             | 1                                                                     | 0                                                           | 1                                | 0                                                           | 0                                                                                 | 1                                                                   | 1                                                                               | 1                                              | 1                                                                                              | 6     | Moderate                                          |
| van Kassel,   | 2019             | 1                                                                     | 1                                                           | 1                                | 1                                                           | 1                                                                                 | 1                                                                   | 1                                                                               | 1                                              | 1                                                                                              | 9     | High                                              |
| van Kassel,   | 2021             | 1                                                                     | 1                                                           | 1                                | 1                                                           | 1                                                                                 | 1                                                                   | 1                                                                               | 1                                              | 1                                                                                              | 9     | High                                              |
| Wang          | 2014             | 1                                                                     | 1                                                           | 1                                | 1                                                           | 1                                                                                 | 1                                                                   | 1                                                                               | 1                                              | 1                                                                                              | 9     | High                                              |
| Zhao          | 2008             | 1                                                                     | 1                                                           | 1                                | 1                                                           | 1                                                                                 | 1                                                                   | 1                                                                               | 1                                              | 1                                                                                              | 9     | High                                              |
| Zhang Nan     | 2019             | 1                                                                     | 1                                                           | 0                                | 1                                                           | 1                                                                                 | 1                                                                   | 1                                                                               | 1                                              | 1                                                                                              | 8     | High                                              |
| Baldan        | 2021             | 1                                                                     | 1                                                           | 1                                | 0                                                           | 1                                                                                 | 1                                                                   | 1                                                                               | 1                                              | 1                                                                                              | 8     | High                                              |
| Flores        | 2015             | 1                                                                     | 1                                                           | 1                                | 0                                                           | 1                                                                                 | 1                                                                   | 1                                                                               | 1                                              | 1                                                                                              | 8     | High                                              |

**Table S5. Overall distribution of sample type from included articles**

| Author names         | Publication Year | Blood | CSF  | Joint fluids or other sterile site | Urine | Blood and CSF | Vaginal/rectal swab | Tissue | Total No sample |
|----------------------|------------------|-------|------|------------------------------------|-------|---------------|---------------------|--------|-----------------|
| Gudjónsdóttir et al. | 2015             | na    | na   | na                                 | na    | na            | na                  | na     | 410*            |
| Kekic et al.         | 2021             | 68    | 8    | 4                                  | 20    | 0             | 971                 | 0      | 1071            |
| Kernéis et al.       | 2017             | 17    | 1    | 120                                | 4     | 26            | 0                   | 0      | 168             |
| Lambertsen et al.    | 2010             | na    | na   | na                                 | na    | na            | na                  | na     | 411*            |
| Lo et al.            | 2019             | 146   | 6    | 0                                  | 0     | 25            | 0                   | 0      | 177             |
| Lopardo et al.       | 2003             | 23    | 2    | 4                                  | 0     | 3             | 0                   | 12     | 44              |
| Lopes et al.         | 2017             | 468   | 11   | 76                                 | 0     | 0             | 0                   | 0      | 555             |
| Meehan et al.        | 2014             | na    | na   | na                                 | na    | na            | na                  | na     | 177*            |
| Nagano et al.        | 2019             | 4     | 0    | 70                                 | 3     | 0             | 0                   | 0      | 74              |
| Otaguiri et al.      | 2013             | 0     | 0    | 0                                  | 52    | 0             | 31                  | 0      | 52              |
| Persson et al.       | 2008             | 0     | 0    | 297                                | 0     | 0             | 0                   | 0      | 297             |
| Slotved et al.       | 2021             | 0     | 0    | 55                                 | 0     | 0             | 0                   | 0      | 55              |
| Tan et al.           | 2016             | 98    | 0    | 0                                  | 0     | 0             | 0                   | 0      | 98              |
| Usein et al.         | 2014             | 0     | 0    | 0                                  | 0     | 0             | 55                  | 0      | 55              |
| van Kassel et al.    | 2019             | 0     | 2579 | 0                                  | 0     | 0             | 0                   | 0      | 2579            |
| van Kassel et al.    | 2021             | 875   | 228  | 0                                  | 0     | 398           | 0                   | 0      | 1501            |
| Wang et al.          | 2014             | na    | na   | na                                 | na    | na            | na                  | na     | 383*            |
| Zhao et al.          | 2008             | 605   | 35   | 23                                 | 0     | 0             | 0                   | 0      | 663             |
| Zhang                | 2019             | 2     | 0    | 2                                  | 8     | na            | 3                   | 0      | 15              |
| Baldan et al.        | 2021             | 0     | 0    | 0                                  | 0     | 0             | 255                 | 0      | 255             |
| McGee et al.         | 2021             | 5503  | 72   | 767                                | 0     | 0             | 0                   | 0      | 6342            |
| Teatero et al.       | 2015a            | 47    | 0    | 20                                 | 0     | 0             | 0                   | 18     | 85              |
| Teatero et al.       | 2014 ; 2015b     | 430   | 2    | 60                                 | 0     | 0             | 0                   | 15     | 507             |

\*Not available: Number of sample positive to GBS were not specified in the study.

**Table S6. Overall distribution of GBS serotype from included articles**

| Author names       | Publication Year | Serotype    |             |             |             |            |             |            |           |           |           |            | Grand Total  |
|--------------------|------------------|-------------|-------------|-------------|-------------|------------|-------------|------------|-----------|-----------|-----------|------------|--------------|
|                    |                  | Ia          | Ib          | II          | III         | IV         | V           | VI         | VII       | VIII      | IX        | NT         |              |
| Gudjónsdóttir      | 2015             | 34          | 45          | 29          | 62          | 14         | 124         | 0          | 0         | 3         | 7         | 0          | 318          |
| Kekic              | 2021             | 15          | 17          | 13          | 32          | 9          | 37          | 0          | 0         | 0         | 0         | 0          | 123          |
| Kernéis            | 2017             | 26          | 12          | 19          | 47          | 12         | 40          | 3          | 3         | 0         | 0         | 1          | 163          |
| Lambertsen         | 2010             | 81          | 38          | 23          | 121         | 18         | 77          | 0          | 0         | 7         | 1         | 45         | 411          |
| Lo                 | 2019             | 3           | 3           | 0           | 12          | 0          | 1           | 4          | 0         | 0         | 0         | 1          | 24           |
| Lopardo            | 2003             | 9           | 1           | 8           | 5           | 5          | 0           | 0          | 0         | 0         | 0         | 3          | 31           |
| Lopes              | 2017             | 169         | 133         | 37          | 70          | 9          | 102         | 2          | 0         | 2         | 8         | 23         | 555          |
| Meehan             | 2014             | 4           | 3           | 8           | 3           | 3          | 8           | 1          | 0         | 0         | 1         | 0          | 31           |
| Nagano             | 2019             | 46          | 3           | 0           | 28          | 0          | 0           | 0          | 0         | 0         | 0         | 1          | 78           |
| Otaguiri           | 2013             | 35          | 0           | 9           | 12          | 0          | 25          | 0          | 0         | 0         | 1         | 1          | 83           |
| Persson            | 2008             | 14          | 24          | 17          | 47          | 11         | 58          | 0          | 0         | 0         | 0         | 3          | 174          |
| Slotved            | 2021             | 19          | 7           | 4           | 3           | 3          | 14          | 1          | 2         | 2         | 0         | 0          | 55           |
| Tan                | 2016             | 1           | 0           | 4           | 26          | 0          | 0           | 4          | 1         | 0         | 0         | 0          | 36           |
| Usein              | 2014             | 3           | 2           | 9           | 18          | 3          | 20          | 0          | 0         | 0         | 0         | 0          | 55           |
| van Kassel         | 2019             | 8           | 2           | 1           | 13          | 2          | 4           | 1          | 1         | /         | /         | 0          | 32           |
| van Kassel         | 2021             | 23          | 12          | 3           | 42          | 2          | 7           | 1          | /         | /         | /         | 5          | 95           |
| Wang               | 2014             | 19          | 91          | 15          | 58          | 33         | 113         | 36         | 4         | /         | /         | 14         | 383          |
| Zhao               | 2008             | 92          | 54          | 37          | 95          | 16         | 115         | 11         | 3         | 2         | /         | /          | 425          |
| Zhang              | 2019             | 1           | 8           | 0           | 0           | 0          | 5           | 0          | 0         | 0         | 0         | 0          | 14           |
| Baldan             | 2021             | 6           | 2           | 2           | 12          | 2          | 11          | 1          | 0         | 0         | 0         | 0          | 36           |
| Flores             | 2015             | 0           | 0           | 0           | 0           | 0          | 229         | 0          | 0         | 0         | 0         | 0          | 229          |
| McGee              | 2021             | 1300        | 875         | 1037        | 735         | 704        | 1081        | 59         | 5         | 17        | 8         | 13         | 5834         |
| Teatero            | 2015a            | 71          | 79          | 61          | 75          | 93         | 112         | 15         | 3         | 15        | 2         | 23         | 549          |
| Teatero et al.     | 2014 ;2015b      | 105         | 54          | 58          | 110         | 36         | 127         | 5          | 1         | 1         | 2         | 7          | 506          |
| <b>Grand Total</b> |                  | <b>2084</b> | <b>1465</b> | <b>1394</b> | <b>1626</b> | <b>975</b> | <b>2310</b> | <b>144</b> | <b>23</b> | <b>49</b> | <b>30</b> | <b>140</b> | <b>10240</b> |



**Table S7. Overall distribution of GBS Clonal complexes from included articles**

| Author names                | Publication Year | Clonal Complexes |          |          |          |           |            |           |            |             |            |             |           |          |          |          |          |          |           |          |            |                    |
|-----------------------------|------------------|------------------|----------|----------|----------|-----------|------------|-----------|------------|-------------|------------|-------------|-----------|----------|----------|----------|----------|----------|-----------|----------|------------|--------------------|
|                             |                  | CC1              | CC4      | CC6      | CC7      | CC8       | CC17       | CC10      | CC12       | CC19        | CC22       | CC23        | CC24      | CC26     | CC28     | CC49     | CC103    | CC297    | CC130     | CC196    | CC459      | other CC#          |
| Kernéis                     | 2017             | 24               | 1        | /        | 4        | 2         | 17         | 8         | 1          | 5           | 0          | 17          | 0         | 0        | 0        | 0        | 0        | 0        | 0         | 0        | 0          | 5 <sup>&amp;</sup> |
| Lopes                       | 2017             | 224              | 6        | 0        | 1        | 0         | 32         | 37        | 0          | 73          | 0          | 157         | 0         | 7        | 0        | 0        | 2        | 0        | 8         | 0        | 0          | 2 <sup>5</sup>     |
| Meehan                      | 2014             | 12               | 0        | 0        | 0        | 0         | 1          | 0         | 8          | 3           | 0          | 5           | 0         | 0        | 0        | 0        | 0        | 0        | 0         | 0        | 0          | 2 <sup>**</sup>    |
| Nagano                      | 2019             | 31               | 0        | 0        | 0        | 0         | 0          | 0         | 0          | 0           | 0          | 0           | 0         | 0        | 0        | 0        | 0        | 0        | 0         | 0        | 0          | 0                  |
| Slotved                     | 2021             | 14               | 0        | 9        | 0        | 9         | 0          | 9         | 0          | 4           | 0          | 4           | 0         | 0        | 0        | 0        | 0        | 0        | 3         | 2        | 0          | 0                  |
| Usein                       | 2014             | 8                | 0        | 0        | 0        | 0         | 13         | 1         | 1          | 9           | 0          | 3           | 0         | 1        | 6        | 1        | 1        | 2        | 0         | 0        | 0          | 6                  |
| van Kassel,                 | 2019             | 5                | 0        | 0        | 0        | 0         | 8          | 3         | 0          | 4           | 0          | 9           | 0         | 0        | 0        | 0        | 0        | 0        | 0         | 0        | 0          | 3                  |
| van Kassel,                 | 2021             | 14               | 0        | 0        | 0        | 0         | 9          | 0         | 0          | 66          | 0          | 44          | 13        | 0        | 0        | 0        | 0        | 0        | 0         | 0        | 0          | 0                  |
| Zhang                       | 2019             | 4                | 0        | 0        | 0        | 0         | 0          | 0         | 0          | 1           | 0          | 2           | 0         | 0        | 0        | 0        | 0        | 0        | 0         | 0        | 0          | 8                  |
| Baldan                      | 2021             | 4                | 0        | 0        | 0        | 0         | 0          | 0         | 0          | 4           | 0          | 2           | 0         | 0        | 0        | 0        | 0        | 2        | 0         | 0        | 0          | 19                 |
| Flores                      | 2015             | 210              | 0        | 0        | 0        | 0         | 0          | 0         | 0          | 8           | 0          | 0           | 0         | 0        | 0        | 0        | 0        | 0        | 0         | 0        | 0          | 11                 |
| McGee                       | 2021             | 1363             | 0        | 0        | 0        | 0         | 252        | 0         | 774        | 841         | 524        | 1445        | 0         | 0        | 0        | 0        | 0        | 0        | 0         | 0        | 562        | 70 <sup>*</sup>    |
| Teatero                     | 2015a            | 243              | /        | /        | /        | /         | /          | /         | /          | /           | /          | 12          | /         | /        | /        | /        | /        | /        | /         | /        | /          | /                  |
| Teatero et al.              | 2014 ; 2015b     | 1                | 0        | 0        | 0        | 0         | 38         | 0         | 0          | 0           | 0          | 0           | 0         | 0        | 0        | 0        | 0        | 0        | 0         | 0        | 0          | 91                 |
| <b>Grand Total (n=7470)</b> |                  | <b>2157</b>      | <b>7</b> | <b>9</b> | <b>5</b> | <b>11</b> | <b>370</b> | <b>58</b> | <b>784</b> | <b>1018</b> | <b>524</b> | <b>1700</b> | <b>13</b> | <b>8</b> | <b>6</b> | <b>1</b> | <b>3</b> | <b>4</b> | <b>11</b> | <b>2</b> | <b>562</b> | <b>217</b>         |

&Other CC include CC27, 167, 186, 238; \$Other CC include CC773, 775; \*\* Other include 2 singleton not specify, \* Other CC include Singleton not reported, CC585/41, 26/1087, 328, 3; #Other CCs including CC3, CC9, CC24, CC26, CC28, CC49, CC103, CC297, CC130, CC196, CC328, CC26/1087, CC585/41

**Table S8.** Summary of resistance genes and virulence factors detected in GBS from included articles.

| Author names       | Publication Year | Resistance genes |             |            |           |             |             |            |           |           |           |           |            | Total         |
|--------------------|------------------|------------------|-------------|------------|-----------|-------------|-------------|------------|-----------|-----------|-----------|-----------|------------|---------------|
|                    |                  | NO ARGs          | tetM        | tetO       | ermA      | ermB        | ermTR       | mefA/E     | aphA-3    | aad-6     | tetM/tetO | tetO/tetL | MsrD       |               |
| Lopardo            | 2003             | 0                | 36          | 3          | 2         | 0           | 1           | 2          | 0         | 0         | 2         | 0         | 0          | 46            |
| Lopes              | 2017             | 0                | 457         | 4          | 0         | 148         | 33          | 2          | 0         | 0         | 14        | 1         | 0          | 659           |
| Meehan             | 2014             | 0                | 0           | 0          | 0         | 16          | 11          | 6          | 0         | 0         | 0         | 0         | 0          | 33            |
| Otaguiri           | 2013             | 0                | 0           | 0          | 9         | 4           | 0           | 5          | 0         | 0         | 0         | 0         | 0          | 18            |
| Persson            | 2008             | /                | /           | /          | /         | 4           | /           | /          | /         | /         | /         | /         | 0          | 4             |
| Usein              | 2014             | /                | 35          | 8          | 10        | 9           | 0           | 4          | 0         | 0         | 0         | 0         | 0          | 66            |
| Zhao               | 2008             | 73               | 560         | 13         | 17        | 22          | 0           | 15         | 8         | 11        | 0         | 0         | 0          | 719           |
| Flores             | 2015             | /                | 183         | 0          | 0         | 78          | 41          | 0          | 0         | 0         | 0         | 0         | 0          | 302           |
| McGee              | 2021             | /                | 4597        | 221        | 0         | 1180        | 1139        | 704        | 32        | 0         | 83        | 0         | 728        | 8684          |
| Teatero            | 2015a            | /                | /           | /          | /         | /           | 93          | /          | /         | /         | /         | /         | 0          | 93            |
| Teatero et al.     | 2014 ; 2015b     | /                | 24          | /          | 19        | /           | 1           | /          | /         | /         | /         | /         | /          | 44            |
| <b>Grand Total</b> |                  | <b>73</b>        | <b>5916</b> | <b>249</b> | <b>76</b> | <b>1461</b> | <b>1320</b> | <b>738</b> | <b>40</b> | <b>11</b> | <b>99</b> | <b>1</b>  | <b>728</b> | <b>10668*</b> |

\*Total number of resistance genes detected among all GBS isolates

| Author names       | Publication Year | Virulence genes |             |             |             |            |           |           |           |           |             |            |             |            |             | Grand Total |               |
|--------------------|------------------|-----------------|-------------|-------------|-------------|------------|-----------|-----------|-----------|-----------|-------------|------------|-------------|------------|-------------|-------------|---------------|
|                    |                  | bca             | alp1        | alp2/3      | rib         | eps        | bac       | cylE      | hylB      | hvgA      | alpha       | PI1        | PI1:PI2A    | PI1:PI2B   | PI2A        |             | PI2B          |
| Lopes              | 2017             | 115             | 0           | 210         | 117         | 113        | 0         | 0         | 0         | /         | 0           | 0          | 333         | 0          | 177         | 9           | 1074          |
| Meehan             | 2014             | 31              | 0           | 31          | 70          | 42         | 26        | 0         | 0         | /         | 0           | 135        | 0           | 0          | 126         | 50          | 511           |
| Nagano             | 2019             | 0               | 0           | 0           | 0           | 0          | 0         | 0         | 0         | /         | 0           | 0          | 0           | 0          | 0           | 0           | 0             |
| Otaguiri           | 2013             | 0               | 0           | 0           | 0           | 0          | 0         | 83        | 83        | /         | 0           | 0          | 42          | 4          | 30          | 7           | 249           |
| Persson            | 2008             | 10              | 20          | 60          | 52          | /          | 33        | /         | /         | /         | 0           | 0          | 0           | 0          | 0           | 0           | 175           |
| Usein              | 2014             | 5               | 12          | 7           | 18          | /          | 1         | /         | /         | /         | 0           | 3          | 29          | 8          | 8           | 7           | 98            |
| McGee              | 2021             | /               | 1658        | 1437        | 1122        | /          | /         | /         | /         | /         | 1567        | 11         | 3527        | 283        | 1839        | 162         | 11606         |
| Teatero et al.     | 2014 ; 2015b     | /               | /           | /           | /           | /          | /         | /         | /         | 38        | 0           | 0          | 0           | 0          | 0           | 0           | 38            |
| <b>Grand Total</b> |                  | <b>161</b>      | <b>1690</b> | <b>1745</b> | <b>1379</b> | <b>155</b> | <b>60</b> | <b>83</b> | <b>83</b> | <b>38</b> | <b>1567</b> | <b>149</b> | <b>3931</b> | <b>295</b> | <b>2180</b> | <b>235</b>  | <b>13751#</b> |

#Total number of virulence genes detected among all GBS isolates

**Table S9.** Description of 9404 GBS isolates used in this study.

Download the table from [https://github.com/UzmaBisit/GBS\\_systematic\\_review\\_non-pregnant\\_population/tree/main](https://github.com/UzmaBisit/GBS_systematic_review_non-pregnant_population/tree/main)

**Table S10.** Country wise distribution of 9404 GBS isolates by study populations.

| Country            | Neonatal invasive disease | Non-pregnant disease | Maternal disease | Maternal carriage | Grand Total |
|--------------------|---------------------------|----------------------|------------------|-------------------|-------------|
| Angola             | 14                        | /                    | /                | /                 | 14          |
| Canada             | 82                        | 221                  | /                | /                 | 303         |
| Denmark            | /                         | 53                   | /                | /                 | 53          |
| France             | 19                        | /                    | /                | /                 | 19          |
| Kenya              | /                         | /                    | /                | 890               | 890         |
| Portugal           | /                         | 2                    | /                | /                 | 2           |
| The Netherlands    | 1339                      | /                    | /                | /                 | 1339        |
| UK                 | /                         | /                    | /                | 524               | 524         |
| USA                | 486                       | 5728                 | 46               | /                 | 6260        |
| <b>Grand Total</b> | <b>1940</b>               | <b>6004</b>          | <b>46</b>        | <b>1414</b>       | <b>9404</b> |

**Table S11.** Percentage of CC1 isolates (n=2555) by GBS populations that harboured at least one macrolide resistance gene (*ermA*, *ermB*, *ermT*, *lsaC*, *mefA* and *msrD*).

| GBS population                    | Isolate with at least one macrolide resistance gene | % of isolates |
|-----------------------------------|-----------------------------------------------------|---------------|
| Maternal carriage (n=243)         | 60                                                  | 25%           |
| Maternal disease (n=8)            | 3                                                   | 38%           |
| Neonatal invasive disease (n=165) | 73                                                  | 44%           |
| Non-pregnant disease (n=2139)     | 1568                                                | 84%           |

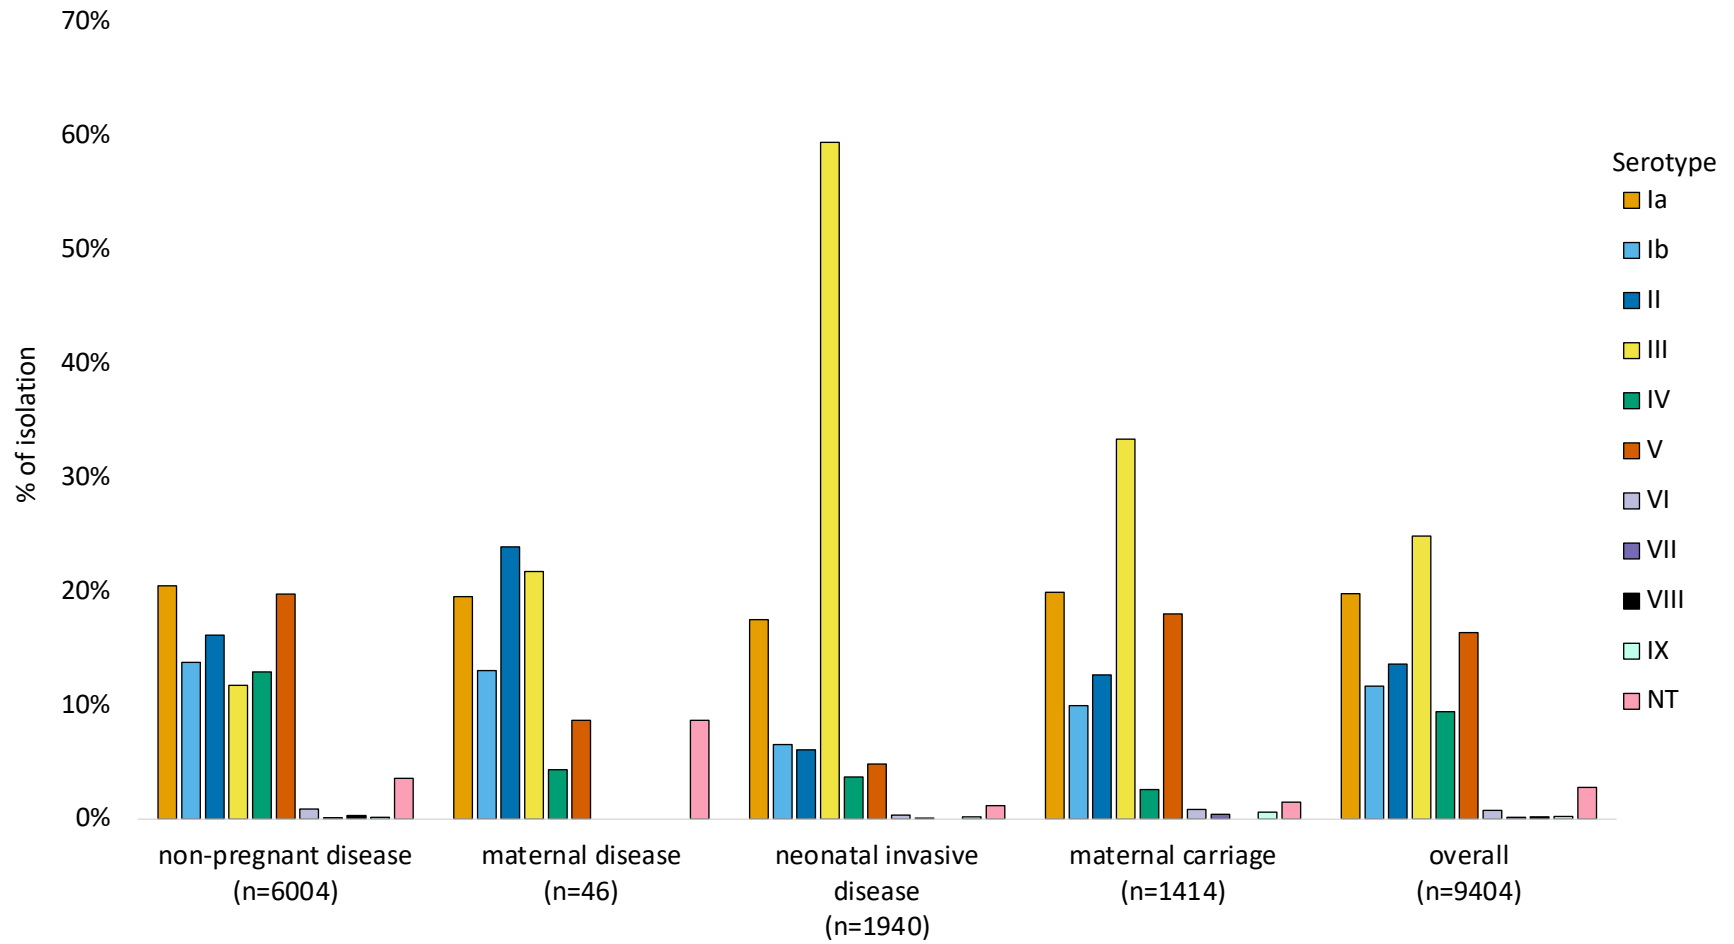

**Figure S1.** Serotype distribution of 9404 GBS by four study populations.

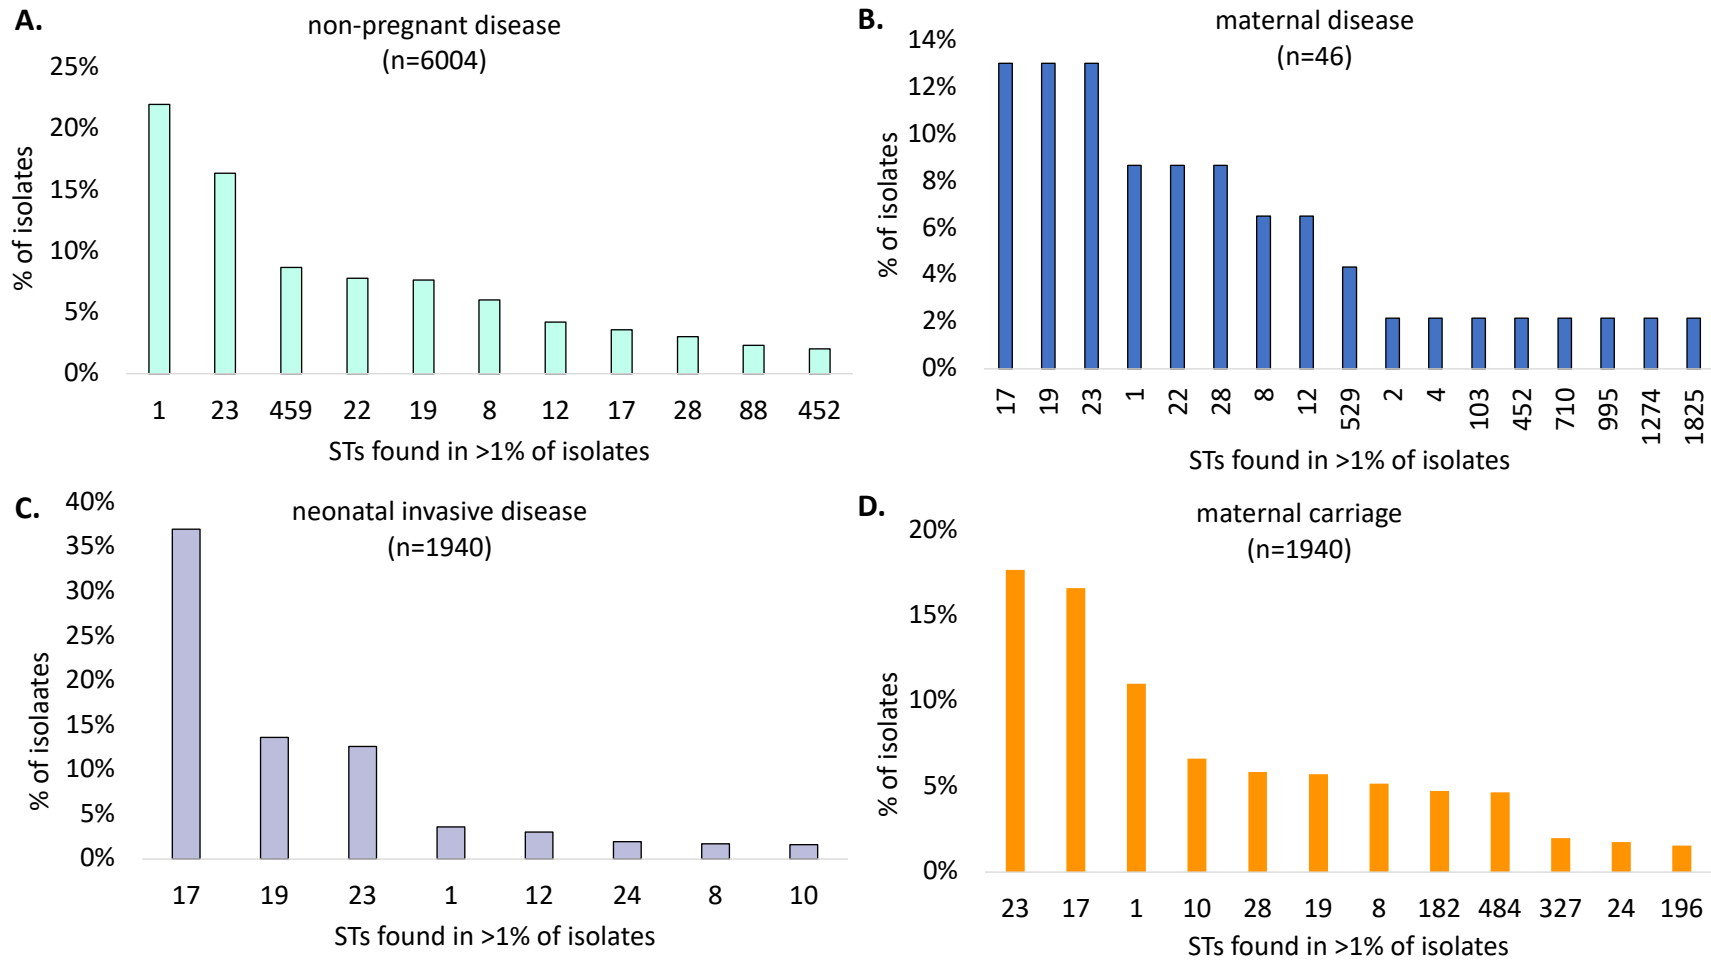

**Figure S2.** Commons STs observed in 9404 GBS isolates by different populations.

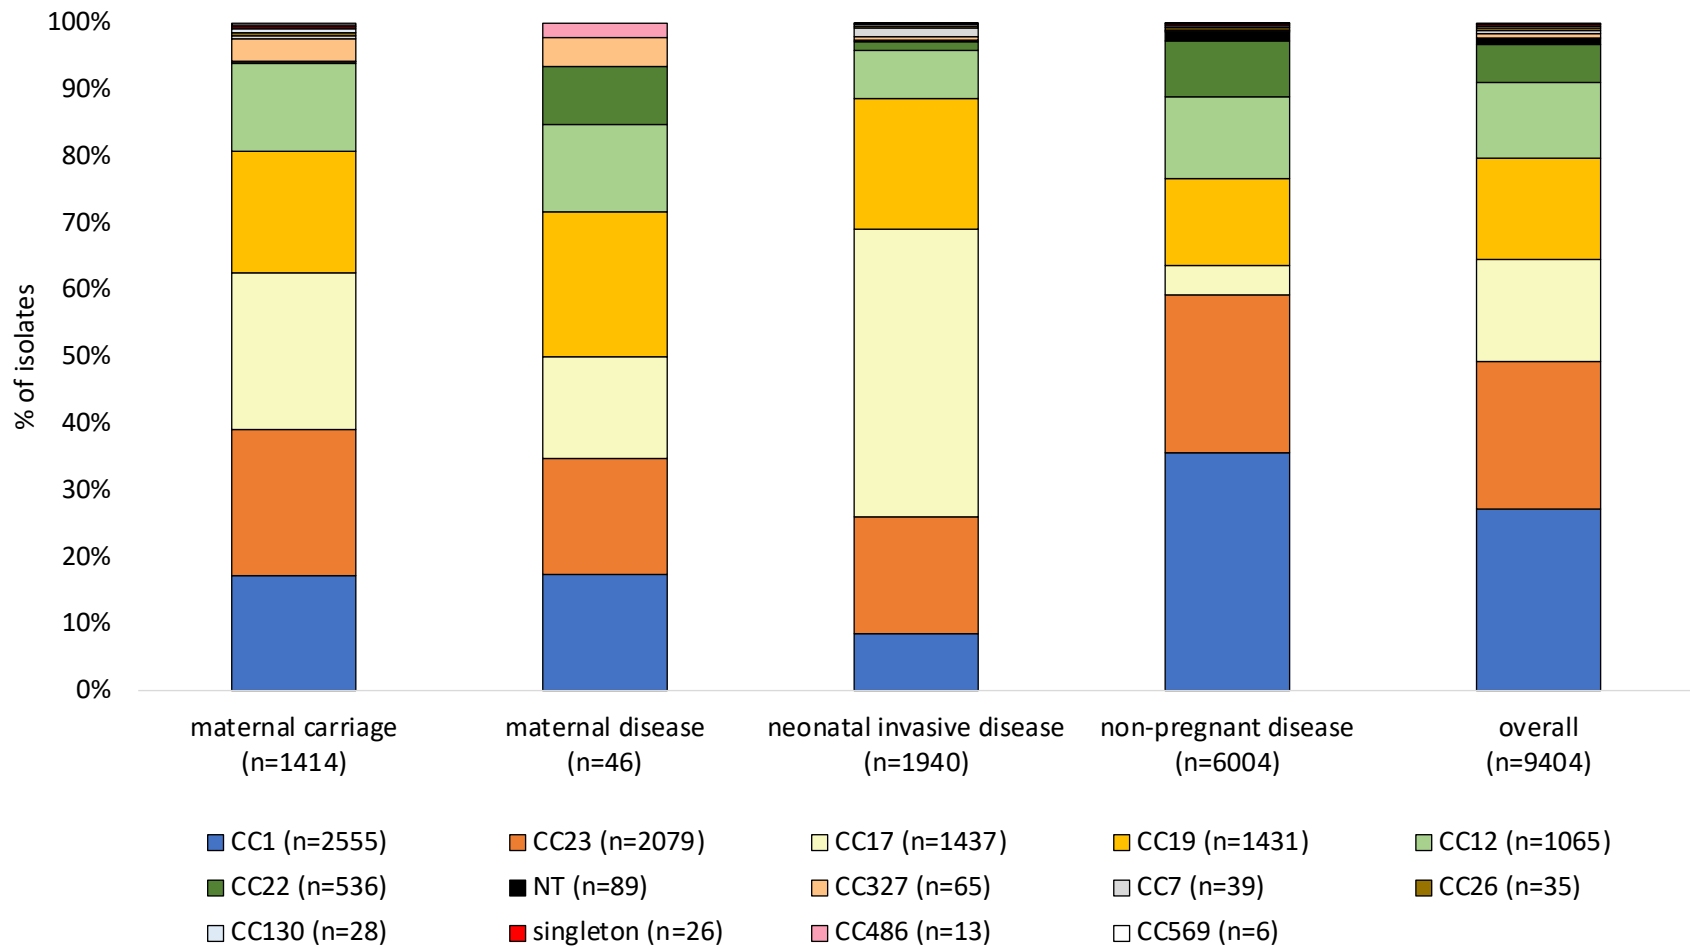

**Figure S3.** Distribution of CCs in 9404 GBS by study populations.

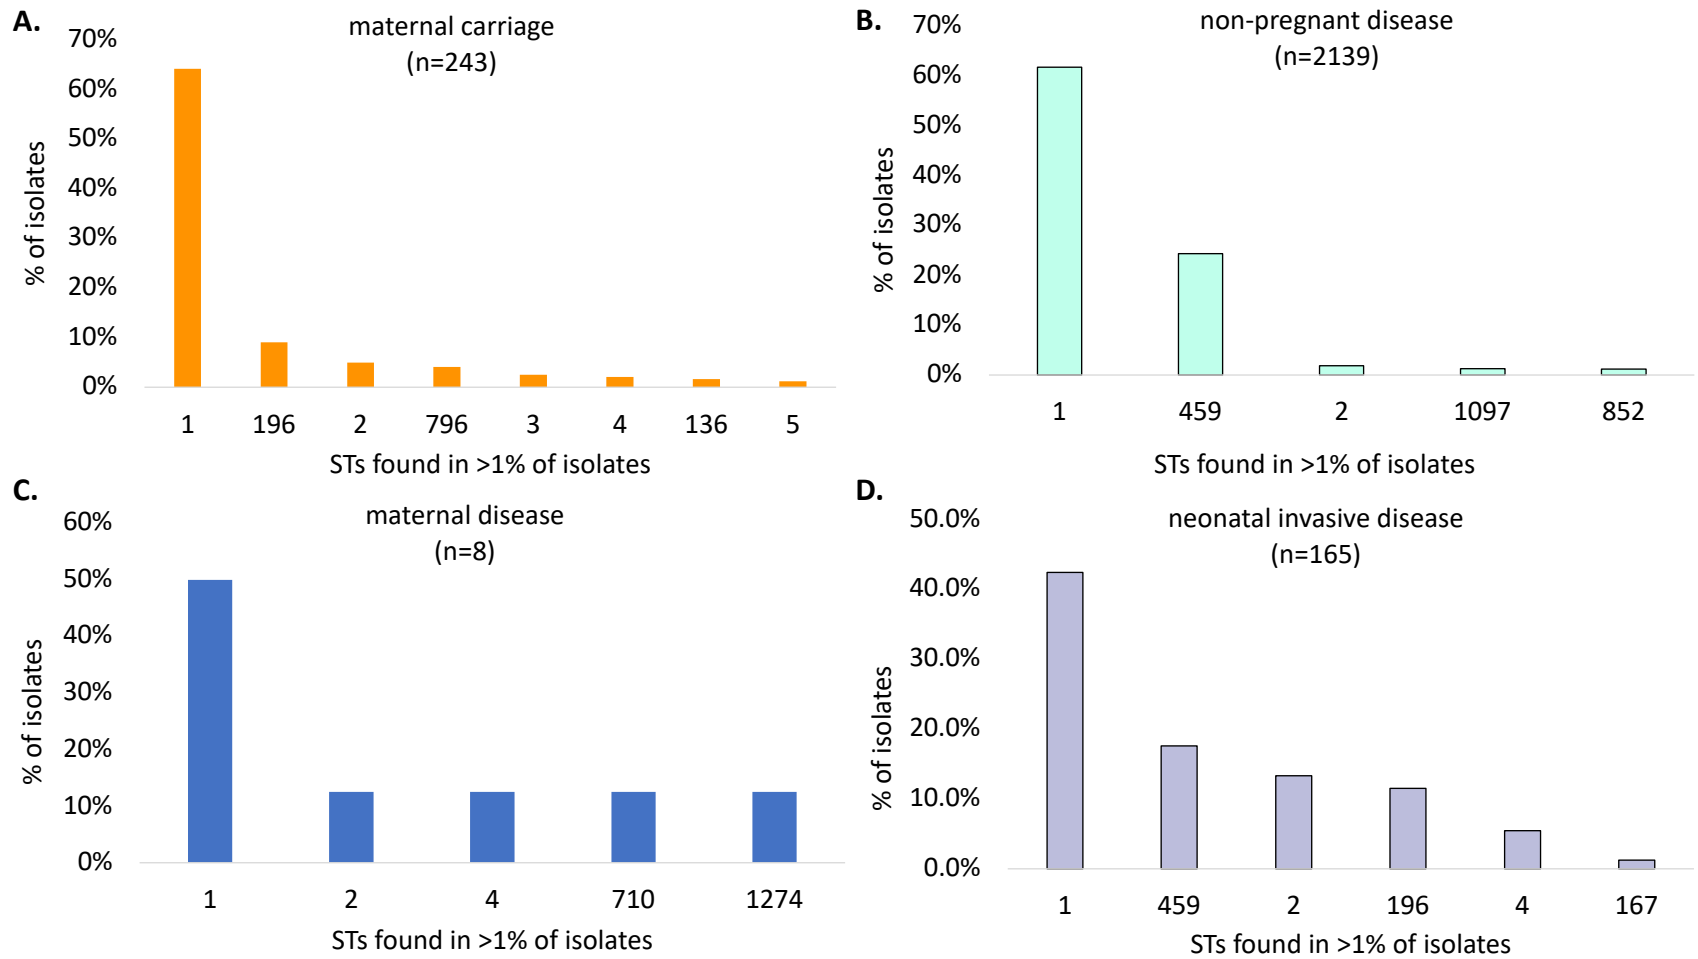

**Figure S4.** Commons STs observed in CC1 isolates (n=2555) by study populations.



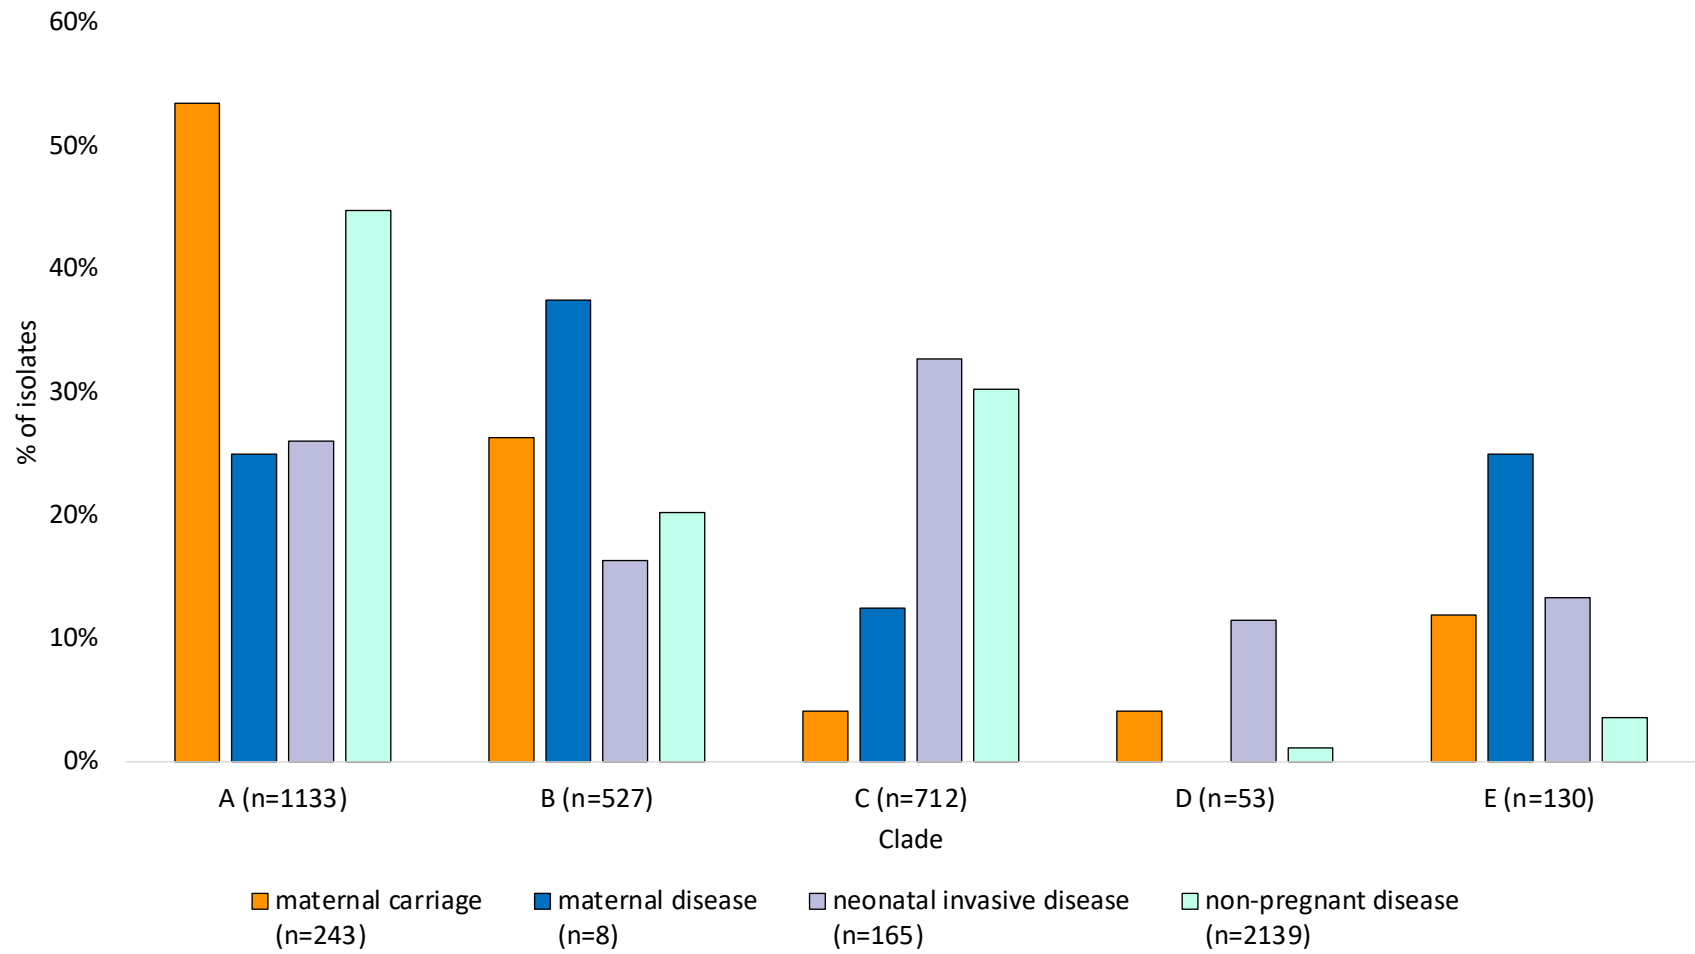

**Figure S5:** The distribution of isolates by study populations in CC1 clades (A-E).

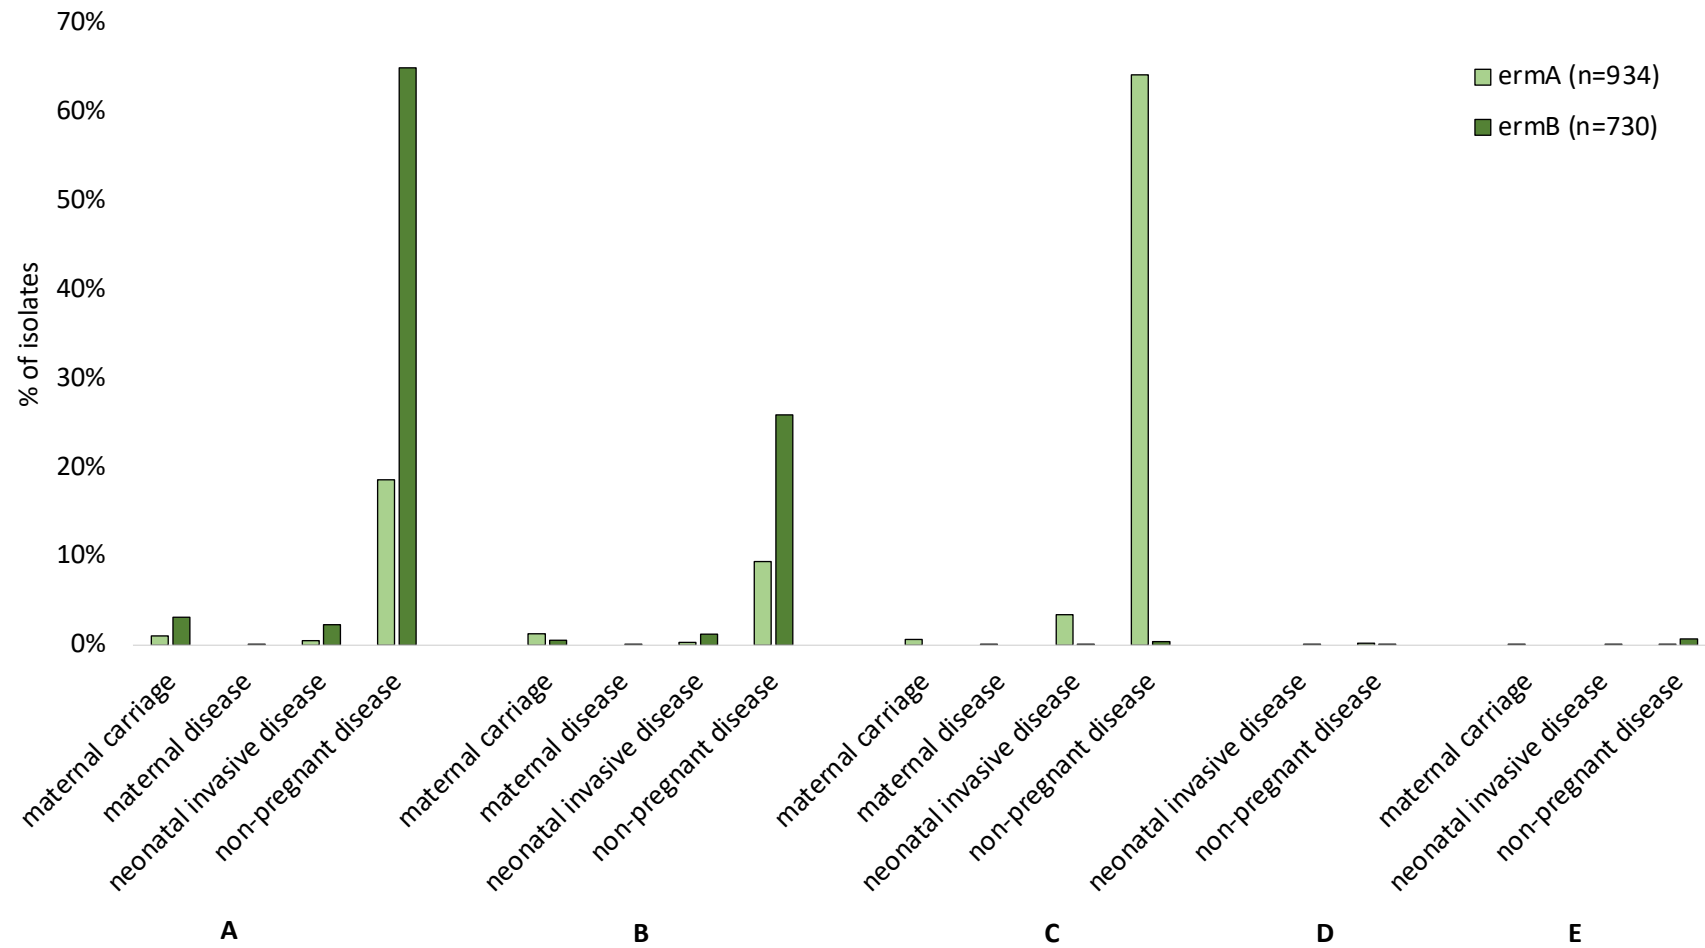

**Figure S6.** Distribution of macrolide resistance genes (*ermA* and *ermB*) in CC1 clades per study populations.
